# Supplementary material for: Should All Patients With HR-Positive HER2-Negative Metastatic Breast Cancer Receive CDK 4/6 Inhibitor As First-Line Based Therapy? A Network Meta-Analysis of Data from the PALOMA 2, MONALEESA 2, MONALEESA 7, MONARCH 3, FALCON, SWOG and FACT Trials
Source: Cancers (Basel). 2019 Oct 26;11(11):1661. doi: 10.3390/cancers11111661 (PMC6896062; doi:10.3390/cancers11111661)
Supplement: Supplementary file 1 [file cancers-11-01661-s001.xlsx]

## Sheet: Sheet1
Table S1. The most important phase II or III ongoing clinical trials investigating CDK 4/6 inhibitors in breast cancer.
Setting	Study	Phase	Status	Arms	Study Population	Primary Endpoint
Adjuvant Luminal breast cancer	PALLAS (NCT02513394) 5794 patients	3	Active, not recruiting	Adjuvant ET (≥5 years) ± palbociclib (for 2 years)	ER+/HER2− Patients at stage II or III	iDFS
	NATALEE (NCT03701334 ) 4000 patients	3	Recruiting	Adjuvant ET ± ribociclib (for 2 years)	HR+/HER2- high risk early breast cancer	iDFS
	MonarchE (NCT03155997) 3580 patients	3	Active, not recruiting	Adjuvant ET ± abemaciclib	ER+/HER2− Node-positive high-risk breast tumors (≥ 4 lymph nodes, tumor > 5 cm, grade 3 or central Ki67 ≥ 20%)	iDFS
Post neoadjuvant luminal breast cancer with residual disease	PENELOPE-B (NCT01864746)	3	Active, not recruiting	Adjuvant ET± palbociclib	ER+/HER2− high-risk postmenopausal women with residual disease post neoadjuvant treatment	iDFS
	PALLET (NCT02296801 )	2	Active,not recruiting	Neoadjuvant Letrozole vs 1) letrozole then letrozole + palbociclib 2) palbociclib then letrozole + palbociclib 3) letrozole + palbociclib	HR+/HER2- postmenopausal women with breast tumor ultrasound size of at least 2.0 cm.	Change in Ki67 from baseline to 14 weeks. Clinical CR, pCR, PEPI score
Neo-Adjuvant Luminal breast cancer	CORALLEEN (NCT03248427) 106 patients	2	Active, not recruiting	Ribociclib plus letrozole vs chemotherapy	Postmenopausal Luminal B/HER2- breast cancer at stage I to IIIA	Rate of ROR-low according to the Prosigna test
	NEOLBC (NCT03283384 ) 100 patients	2	Recruiting	After letrozole 2.5 mg die for 2 weeks: 1) letrozole 2.5 mg until surgery if Ki67 <1%; 2) chemotherapy vs ribociclib plus letrozole if Ki67 >=1%	HR+/HER2- early breast cancer at clinical stage II or III	Percentage of Ki67 <1% between ribociclib plus letrozole and chemotherapy in the surgical specimen.
	FELINE (NCT02712723) 121 patients	2	Active, not recruiting	Neoadjuvant letrozole ± ribociclib	HR+/HER2- postmenopausal women with early breast cancer at clinical stage II or III	PEPI score 0 at surgery Ki67 change rate pCR
	NeoMONARCH (NCT02441946) 224 patients	2	Completed	Abemaciclib + anastrozole vs anastrozole or abemaciclib alone	Postmenopausal Women HR+/HER2- Breast tumor >= 1 cm	Percentage change in kI67 pCR
MBC	NCT02738866 100 patients	2	Recruiting	Palbociclib plus fulvestrant	HR+/HER2- MBC patients previously treated with palbociclib plus AI (Second line setting)	PFS Prevalence of ESR1 and PI3K mutations
	FATIMA (NCT02917005 ) 160 patients	2	Recruiting	Palbociclib plus exemestane plus OFS vs exemesatne plus OFS	HR+/HER2 – premenopausal women with MBC	PFS, RR, CB
	PEARL (NCT02028507) 596 patients	3	Active, not recruiting	Palbociclib plus ET vs chemiotherapy	HR+/HER2 –women with MBC in progression after AI	PFS
	KENDO (NCT03227328) 150 patients	2	Recruiting	ET plus CDK 4/6 inhibitors vs chemotherapy plus ET	HR+/ HER2+ women with MBC	PFS QoL
MBC HR+/HER2+	(NCT03709082) 62 patients	1 and 2	Recruiting	Palbociclib plus letrozole plus TDM1	HR+/ HER2+ women with MBC	DLT, ORR
	(NCT03913234) 95 patients	1B and 2	Not yet recruiting	Ribociclib + trastzumab + letrozole	HR+/ HER2+ postmenopausal women with MBC	PFS OS, RR, QoL
	MonarcHER (NCT02675231) 225 patients	2	Active, not recruiting	Trastuzumab + Standard of Care Chemotherapy vs: 1) Abemaciclib + Trastuzumab + Fulvestrant 2) Abemaciclib + Trastuzumab	HR+/ HER2+ postmenopausal women with MBC	PFS OS, RR
MBC TN	NCT02605486 51 patients	1 and 2	Recruiting	Palbociclib plus bicalutamide	AR+/HR-/HER2- MBC	Dose recommended PFS, RR
	NCT03130439 37 patients	2	Recruiting	Abemaciclib	Triple Negative and RB+ MBC	OR PFS, OS
MBC Immunotherapy association	NCT02778685 22 patients	2	Recruiting	Pembrolizumab plus letrozole plus palbociclib	HR+/HER2- postmenopausal MBC	RR
